# Supplementary material
Source: PubMed Central journal article supplement (PMC7572940)
Supplement: 13613_2020_763_MOESM1_ESM.pdf [file 13613_2020_763_MOESM1_ESM.pdf]

# **Patient-ventilator asynchrony in acute brain-injured patients: a prospective observational study**

Xu-Ying Luo, Xuan He, Yi-Min Zhou, Yu-Mei Wang, Jing-Ran Chen, Guang-Qiang Chen, Hong-Liang Li, Yan-Lin Yang, Linlin Zhang, Jian-Xin Zhou

## **Additional file 1**

### **Contents**

- Definition of patient-ventilator asynchrony and example waveforms
- Table S1** Inter-observer reliability for the detection of asynchrony
- Table S2** Asynchrony index in enrolled patients (n=100)
- Figure S1** Proportion of ventilatory modes in different types of asynchrony
- Figure S2** Asynchrony index with administration of different opioids and sedatives
- Table S3** Factors associated with severe ineffective triggering on the basis of dataset analysis
- Table S4** Factors associated with severe ineffective triggering on the basis of patient analysis

## Definition of patient-ventilator asynchrony and example waveforms

Seven asynchrony patterns were determined through a priori definition, including ineffective triggering, double triggering, auto-triggering, flow insufficiency, premature cycling, delayed cycling, and reverse triggering [S1-S5].

### References

- S1. Pham T, Telias I, Piraino T, Yoshida T, Brochard LJ: Asynchrony Consequences and Management. *Crit Care Clin* 2018; 34:325-341
- S2. Esperanza JA, Sarlabous L, de Haro C, Magrans R, Lopez-Aguilar J, Blanch L: Monitoring Asynchrony During Invasive Mechanical Ventilation. *Respir Care* 2020; 65:847-869
- S3. Georgopoulos D, Prinianakis G, Kondili E: Bedside waveforms interpretation as a tool to identify patient-ventilator asynchronies. *Intensive Care Med* 2006; 32: 34-47
- S4. Murias G, Lucangelo U, Blanch L: Patient-ventilator asynchrony. *Curr Opin Crit Care* 2016; 22: 53-59
- S5. Antonogiannaki EM, Georgopoulos D, Akoumianaki E: Patient-Ventilator Dyssynchrony. *Korean J Crit Care Med* 2017; 32: 307-322
- S6. de Haro C, Lopez-Aguilar J, Magrans R, Montanya J, Fernandez-Gonzalo S, Turon M, Goma G, Chacon E, Albaiceta GM, Fernandez R, Subira C, Lucangelo U, Murias G, Rue M, Kacmarek RM, Blanch L, Asynchronies in the Intensive Care Unit G: Double Cycling During Mechanical Ventilation: Frequency, Mechanisms, and Physiologic Implications. *Crit Care Med* 2018; 46: 1385-1392
- S7. Nilsestuen JO, Hargett KD: Using ventilator graphics to identify patient-ventilator asynchrony. *Respir Care* 2005; 50: 202-234
- S8. de Wit M: Monitoring of patient-ventilator interaction at the bedside. *Respir Care* 2011; 56: 61-72
- S9. Gilstrap D, MacIntyre N: Patient-ventilator interactions. Implications for clinical management. *Am J Respir Crit Care Med* 2013; 188:1058-1068

### Abbreviations

Paw: airway pressure; Pes: esophageal pressure

### 1. Ineffective triggering [S1-S3, S5]

Ineffective triggering is defined as that a negative deflection in esophageal pressure is presented but ventilator does not deliver inspiration. Ineffective triggering can occur during either expiratory or inspiratory phase. The following figure shows the waveforms during pressure assist/control ventilation. The patient has three attempts that do not trigger the ventilator. Two arrows A indicate ineffective triggering during expiratory phase. Arrow B indicate ineffective triggering during inspiratory phase. The red line indicates the onset of inspiratory effort.

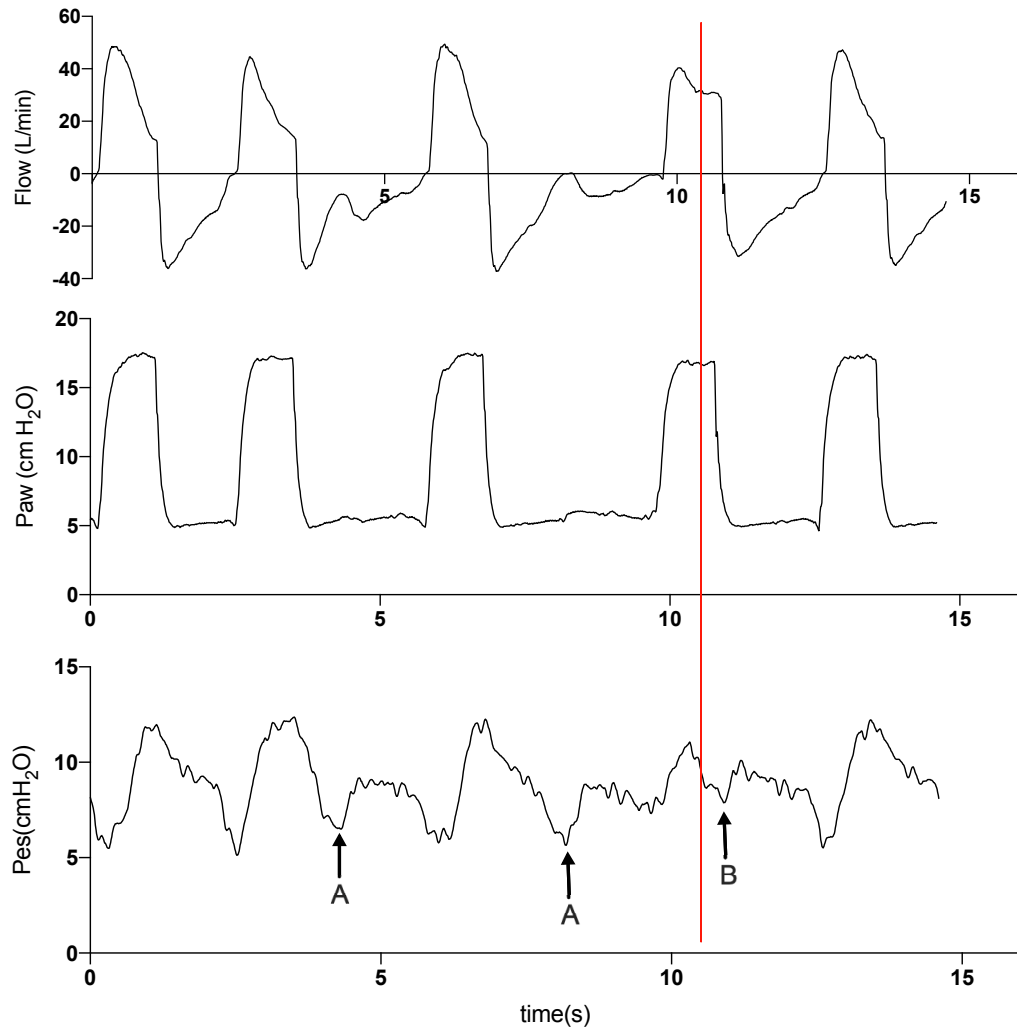

## 2. Double triggering [S3, S6]

Double triggering is defined as that two complete inspirations separated by a very short expiratory time, which is usually resulted from the patient's inspiratory time longer than the ventilator's delivered inspiratory time. The persistence of the patient's inspiratory effort triggers the ventilator a second time without allowing the completion of expiration. The following figure shows the waveforms during volume assist/control ventilation. Red line indicates the cycling of the ventilator, but the patient's inspiratory effort continues.

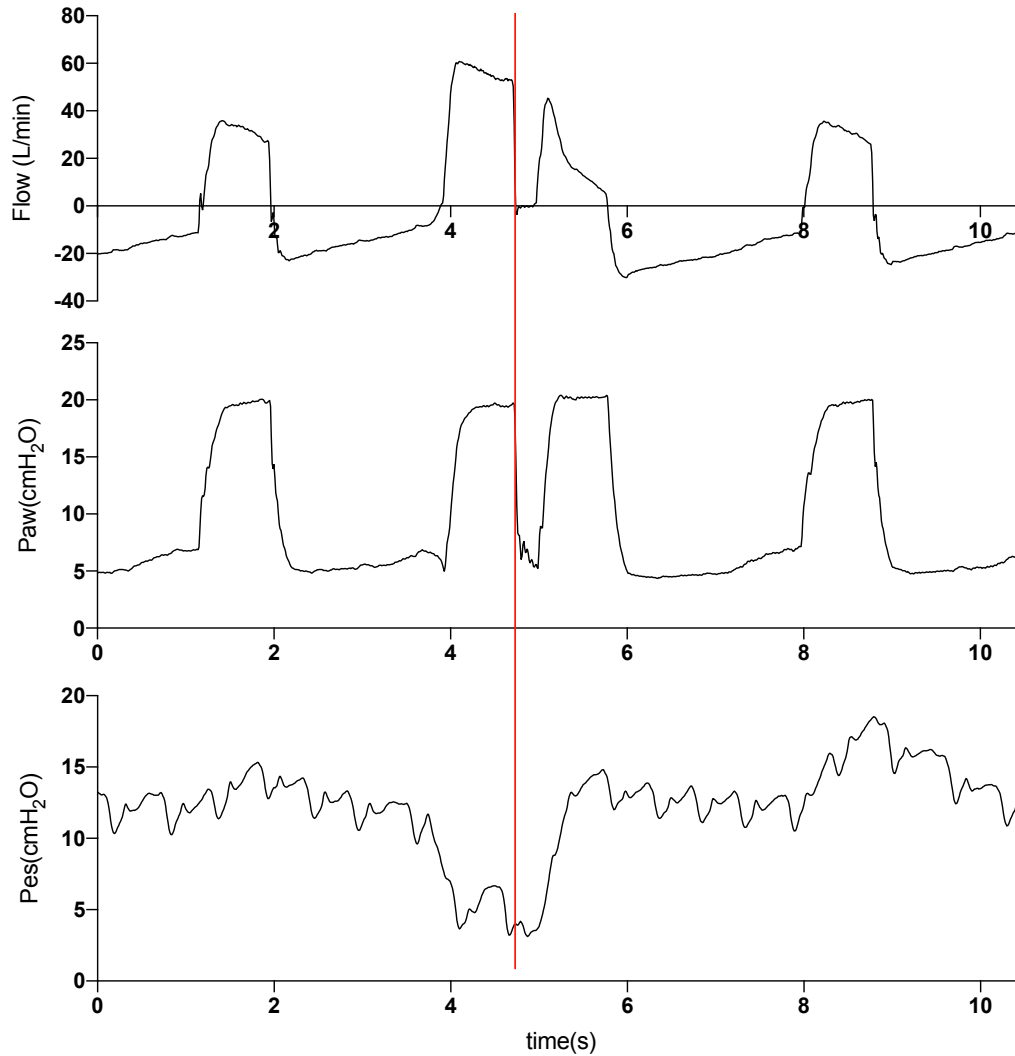

### 3. Auto-triggering [S3, S5]

Auto-triggering is defined as the ventilator being triggered in the absence of patient's effort. The following figure shows the waveforms in patient with deep coma during pressure assist/control ventilation. The respiratory rate was set as 10 breaths/min. The monitored respiratory rate was 15 breaths/min. No negative deflection can be found at the beginning of inspiration. End-expiratory occlusion did not induce the patient's spontaneous inspiration. This case of auto-triggering was resulted from leak after checking the ventilator circuit.

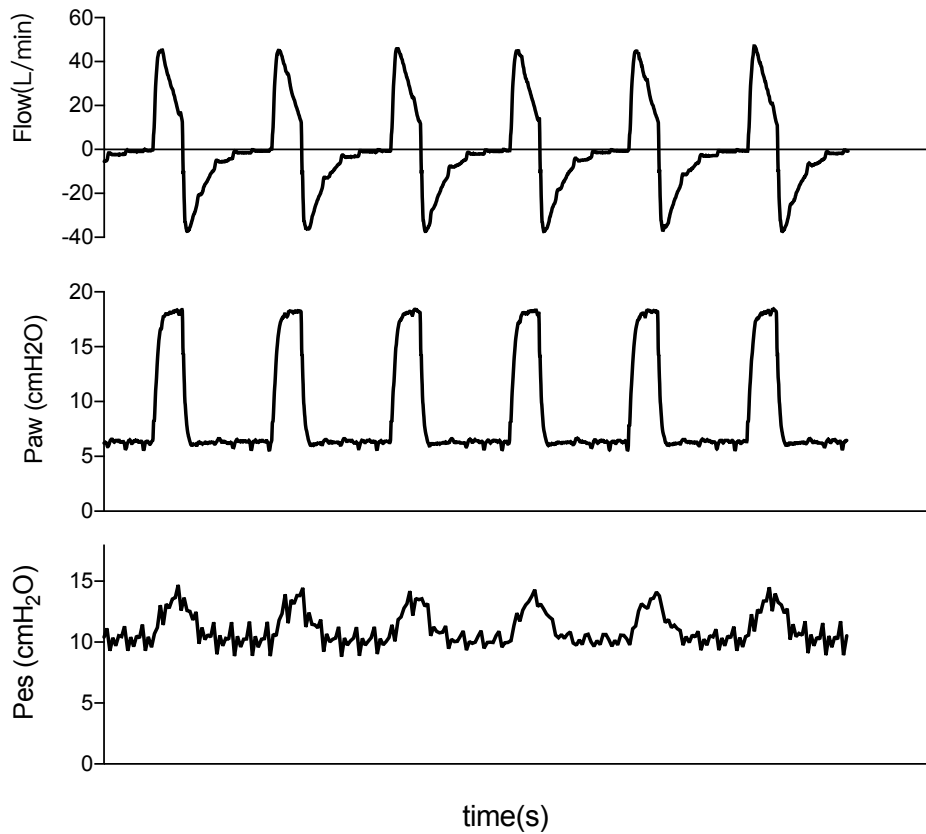

#### 4. Flow insufficiency [S4, S7-S9]

Flow insufficiency is defined as that inspiratory flow delivered by the ventilator does not fully meet the patient's inspiratory demand. The following figure shows the waveforms during volume assist-control ventilation. It can be found a concave deflection in the airway pressure tracing during the inspiratory phase (red arrows). Blue arrows indicate relatively large negative deflection in the esophageal pressure tracing representing the patient's effort.

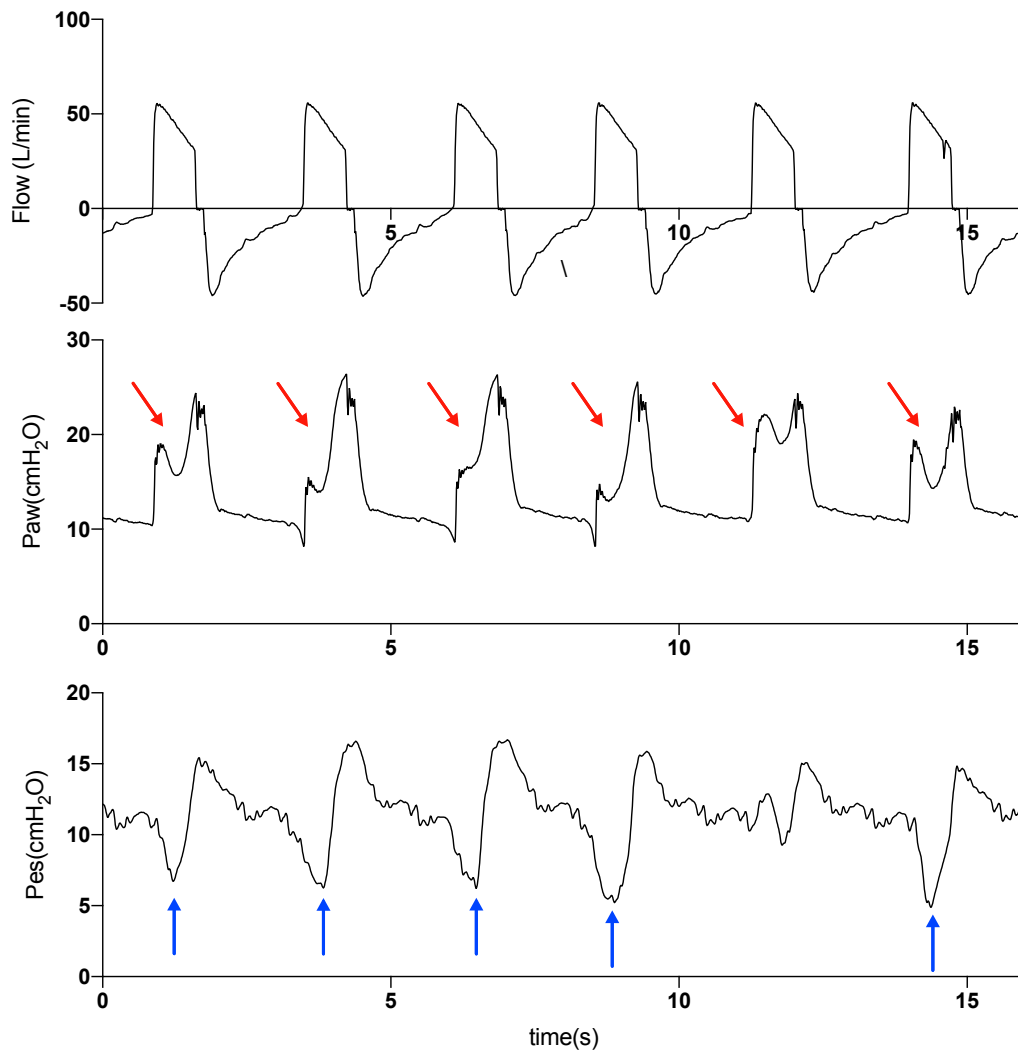

### 5. Premature cycling [S1, S3]

Premature cycling is defined as that the patient's inspiratory effort continues during the ventilator cycles from inspiration to expiration. The following figure shows the waveforms during pressure support ventilation. After the ventilator's cycling (red line), the patient's inspiratory effort continues indicated by the negative deflection of the esophageal pressure tracing (arrows).

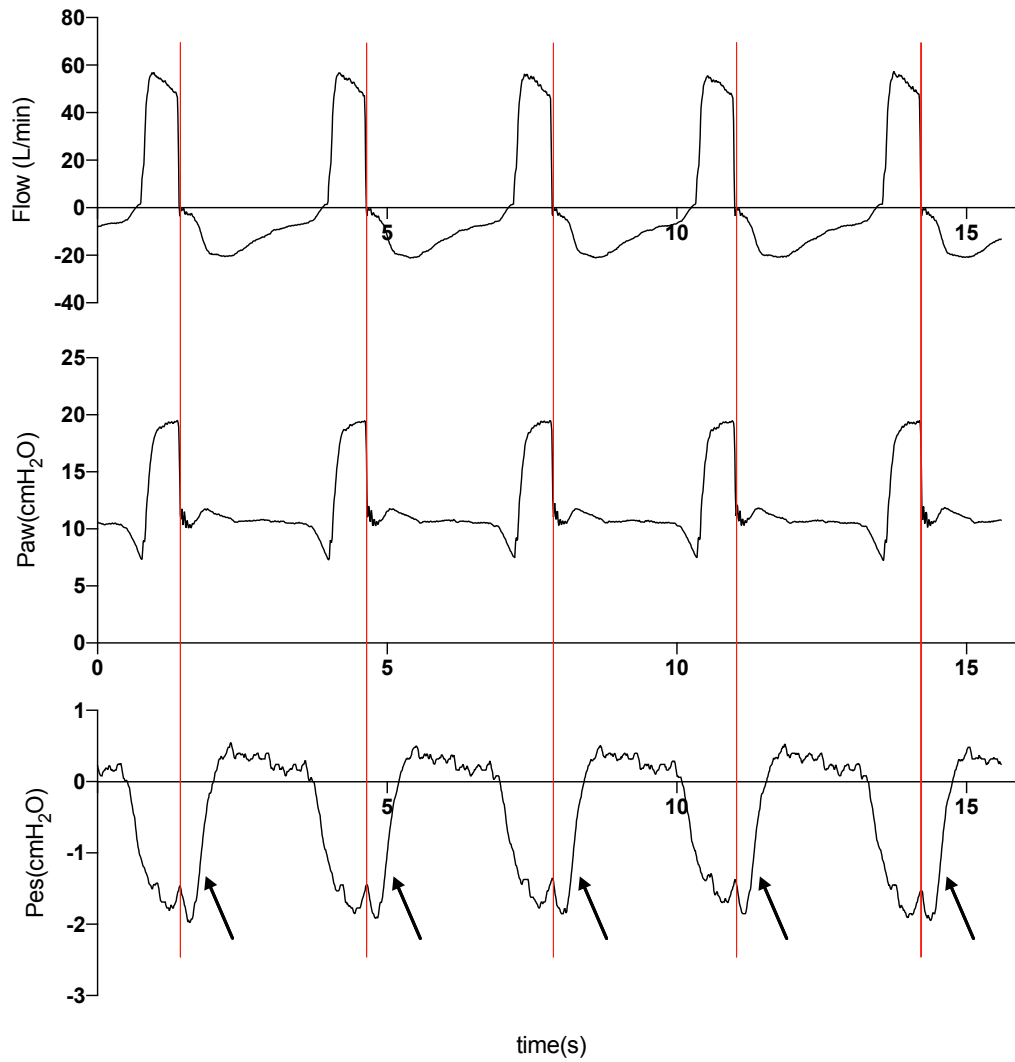

## 6. Delayed cycling [S1, S3-S5]

Delayed cycling is defined as that the ventilator delivery of inspiration continues after the patient's inspiratory effort has ceased. The following figure shows the waveforms during pressure support ventilation. The red line indicates the ventilator cycling. The blue line indicates the termination of patient's inspiratory effort which can be measured as the esophageal pressure increasing to 70% of the maximal negative deflection. An overshoot in airway pressure tracing can be found at the end of inspiration (arrows).

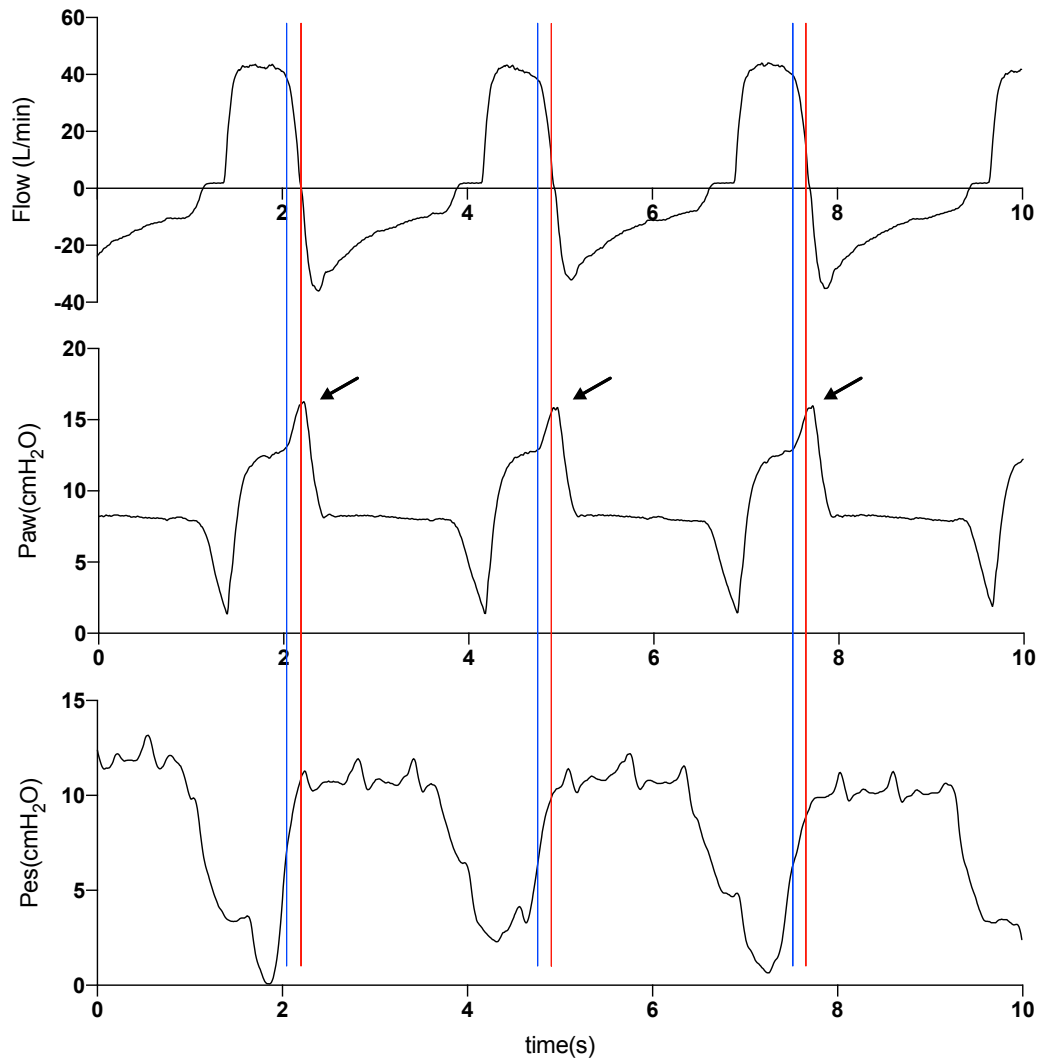



## 7. Reverse triggering [S1, S4]

Reverse triggering is defined as the ventilator triggered patient's muscular effort, which occurs during controlled ventilation. The following figure shows the waveforms during volume assist/control ventilation. Arrows show the patient's inspiratory efforts triggered by the ventilator in a repetitive and consistent manner. Blue arrows show reverse triggering without breath stacking; and the red arrow shows a relative stronger inspiratory effort triggered by the ventilator, which causes a second breath delivering (breath stacking).

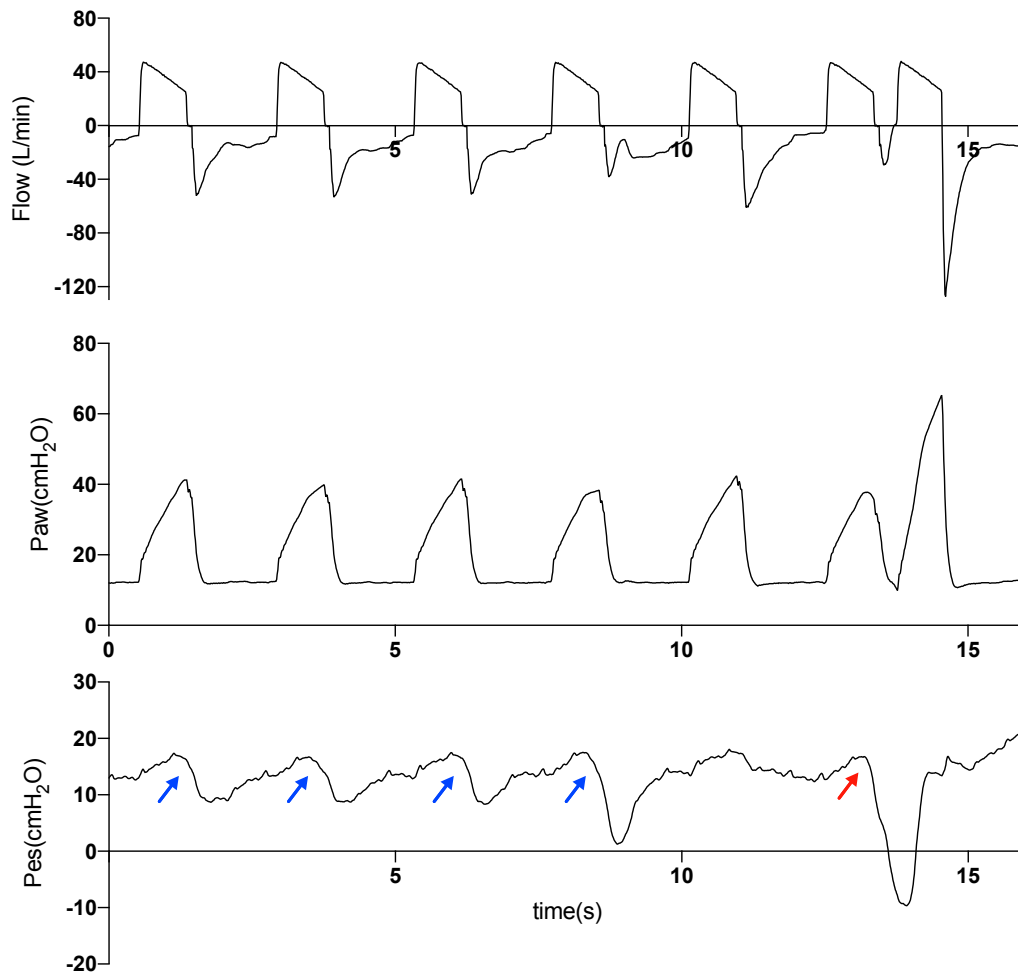

**Table S1** Inter-observer reliability for the detection of asynchrony

| Type of asynchrony     | Number of breaths<br>detected by<br>observer A | Number of breaths<br>detected by<br>observer B | Number of breaths<br>finally confirmed | Weighted kappa (95% CI) |
|------------------------|------------------------------------------------|------------------------------------------------|----------------------------------------|-------------------------|
| Ineffective triggering | 34941                                          | 34134                                          | 35003                                  | 0.986 (0.985–0.987)     |
| Double triggering      | 1801                                           | 1697                                           | 1851                                   | 0.956 (0.949–0.963)     |
| Auto-triggering        | 1547                                           | 1641                                           | 1672                                   | 0.991 (0.987–0.994)     |
| Flow insufficiency     | 3821                                           | 4581                                           | 4277                                   | 0.965 (0.961–0.969)     |
| Premature cycling      | 20363                                          | 16877                                          | 19282                                  | 0.930 (0.927–0.933)     |
| Delayed cycling        | 4208                                           | 3450                                           | 3858                                   | 0.944 (0.938–0.949)     |
| Reverse triggering     | 4014                                           | 4390                                           | 4213                                   | 0.979 (0.976–0.982)     |

95% CI confidence interval

**Table S2** Asynchrony index in enrolled patients (n=100)

| Type of asynchrony     | Asynchrony index<br>%, median (IQR) |
|------------------------|-------------------------------------|
| All types              | 12.4 (4.3–26.4)                     |
| Ineffective triggering | 4.3 (1.9–11.8)                      |
| Double triggering      | 0.2 (0.1–0.5)                       |
| Auto-triggering        | 7.7 (2.7–12.6)                      |
| Flow insufficiency     | 3.8 (1.1–11.8)                      |
| Premature cycling      | 1.8 (0.2–11.5)                      |
| Delayed cycling        | 0.6 (0.2–4.8)                       |
| Reverse triggering     | 15.0 (7.2–24.3)                     |

*IQR* interquartile range

**Figure S1** Proportion of ventilatory modes in different types of asynchrony

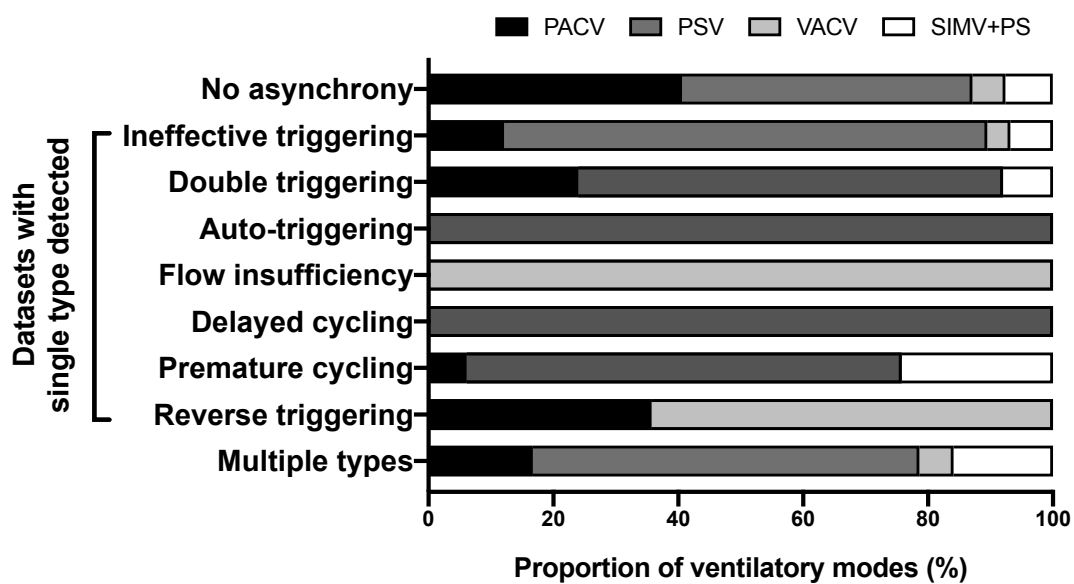

Abbreviations

*PACV* pressure assist/control ventilation, *PSV* pressure support ventilation, *VACV* volume assist/control ventilation, *SIMV+PS* pressure-preset synchronized intermittent mandatory ventilation plus pressure support

**Figure S2** Asynchrony index with administration of different opioids and sedatives

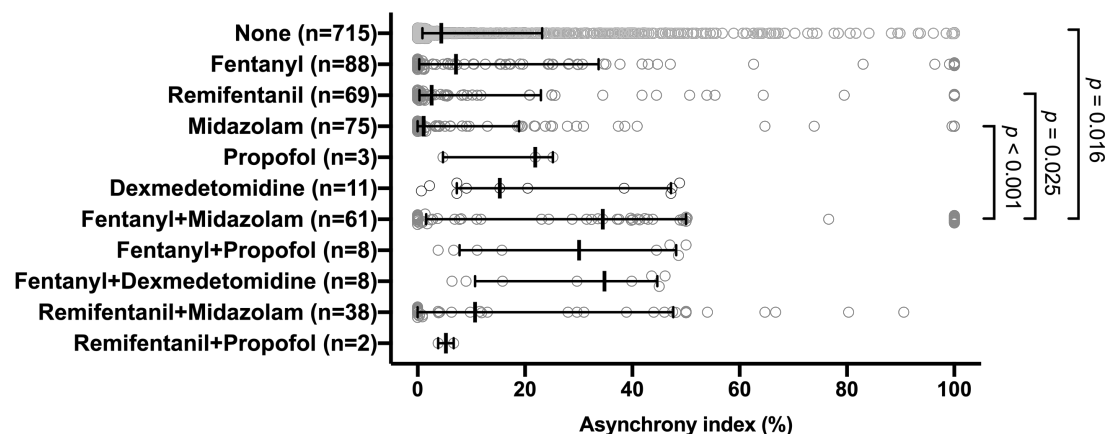

Data are shown as individual values, median and interquartile range.

A significant difference was found in asynchrony index in datasets with administration of different opioids and sedatives ( $p < 0.001$ ). Asynchrony index was significantly higher during combined use of fentanyl and midazolam, compared to that during single administration of midazolam ( $p < 0.001$ ) or remifentanyl ( $p = 0.025$ ) as well as that without opioids and sedatives administration ( $p = 0.016$ ). There was no significant difference among other pairwise comparisons ( $p > 0.05$ ).

**Table S3** Factors associated with severe ineffective triggering on the basis of dataset analysis

|                                                  | AI $\geq$ 10% (n=275) | AI <10% (n=801)       | <i>p</i> |
|--------------------------------------------------|-----------------------|-----------------------|----------|
| Ventilatory mode, <i>n</i> (%)                   |                       |                       | 0.027    |
| PACV                                             | 56 (20.4)             | 143 (17.9)            |          |
| PSV                                              | 163 (59.3)            | 536 (66.9)            |          |
| VACV                                             | 15 (5.5)              | 49 (6.1)              |          |
| SIMV+PS                                          | 41 (14.9)             | 73 (9.1)              |          |
| Ventilatory parameters                           |                       |                       |          |
| Respiratory rate, breaths/min                    | 15 (13–19)            | 18 (15–21)            | <0.001   |
| Tidal volume, ml/kg IPW                          | 8.1 (7.2–9.8)         | 8.0 (7.0–9.2)         | 0.024    |
| Minute ventilation, L/min                        | 7.7 (6.2–9.9)         | 8.9 (7.7–10.9)        | <0.001   |
| PEEP, cmH <sub>2</sub> O                         | 6 (5–8)               | 5 (5–8)               | 0.297    |
| Type of trigger, <i>n</i> (%)                    |                       |                       | 0.001    |
| Flow                                             | 230 (83.6)            | 588 (73.4)            |          |
| Pressure                                         | 45 (16.4)             | 213 (26.6)            |          |
| Flow trigger sensitivity, L/min                  | 2 (2–3)               | 3 (2–3)               | <0.001   |
| Pressure trigger sensitivity, cmH <sub>2</sub> O | 1.0 (1.0–1.5)         | 1.0 (1.0–1.5)         | <0.001   |
| <i>P</i> <sub>0.1</sub> , cmH <sub>2</sub> O     | 1.2 (0.9–2.0) (n=274) | 1.6 (1.0–2.7) (n=763) | <0.001   |
| GCS                                              | 10 (6–11)             | 9 (6–11)              | 0.001    |
| SAS                                              | 3 (2–4)               | 3 (2–4)               | 0.101    |
| Use of sedatives and/or opioids, <i>n</i> (%)    |                       |                       | 0.063    |
| None                                             | 197 (71.6)            | 518 (72.4)            |          |
| Only opioids                                     | 27 (9.8)              | 130 (16.2)            |          |
| Opioids plus sedatives                           | 29 (10.5)             | 86 (10.7%)            |          |
| Only sedatives                                   | 22 (8.0)              | 67 (8.4)              |          |
| Blood gas analysis                               | (n=100)               | (n=313)               |          |
| pH                                               | 7.46 (7.42–7.49)      | 7.47 (7.43–7.50)      | 0.121    |
| PaCO <sub>2</sub> , mmHg                         | 42 (36–46)            | 37 (34–41)            | <0.001   |
| HCO <sub>3</sub> <sup>2-</sup> , mmol/L          | 29 (26–31.3)          | 27.3 (25.5–29.8)      | 0.007    |
| PaO <sub>2</sub> /FiO <sub>2</sub> , mmHg        | 269 (198–362)         | 246 (195–336)         | 0.173    |

Categorical variables are shown as number (percentage); continuous variables are shown as median (interquartile range).

*FiO<sub>2</sub>* inspired oxygen fraction, *GCS* Glasgow Coma Scale, *P*<sub>0.1</sub> airway occlusion pressure, *PACV* pressure assist/control ventilation, *PaO<sub>2</sub>* arterial partial pressure of oxygen, *PEEP* end-expiratory positive pressure, *PSV* pressure support ventilation, *SAS* Sedation-Agitation Scale, *SIMV+PS* pressure-preset synchronized intermittent mandatory ventilation plus pressure support, *VACV* volume assist/control ventilation

**Table S4** Factors associated with severe ineffective triggering on the basis of patient analysis

|                                                              | AI $\geq$ 10% (n=31) | AI<10% (n=69)    | <i>p</i> |
|--------------------------------------------------------------|----------------------|------------------|----------|
| Male sex, <i>n</i> (%)                                       | 19 (61.3)            | 48 (69.6)        | 0.416    |
| Age, yr                                                      | 55 (39-67)           | 52 (39-63)       | 0.288    |
| Body mass index, kg/m <sup>2</sup>                           | 24.2 (21.6-25.8)     | 24.2 (21.2-26.6) | 0.500    |
| Classification of brain injury, <i>n</i> (%)                 |                      |                  | 0.829    |
| Stroke                                                       | 13 (41.9)            | 31 (44.9)        |          |
| Post-craniotomy for brain tumors                             | 11 (35.5)            | 26 (37.7)        |          |
| Traumatic brain injury                                       | 7 (22.6)             | 12 (17.4)        |          |
| APACHE II at the ICU admission                               | 19 (14-22)           | 18 (14-21)       | 0.820    |
| SOFA at the inclusion                                        | 5 (4-7)              | 6 (5-8)          | 0.327    |
| GCS at the inclusion                                         | 10 (6-11)            | 8 (5-11)         | 0.290    |
| Duration of mechanical ventilation before the inclusion, h   | 20 (16-23)           | 19 (15-21)       | 0.050    |
| Acute hypoxemic respiratory failure, <i>n</i> (%)            | 22 (71)              | 54 (78.3)        | 0.430    |
| PaO <sub>2</sub> /FiO <sub>2</sub> ratio at inclusion, mmHg  | 250 (173-393)        | 223 (176-295)    | 0.226    |
| Duration of mechanical ventilation after the inclusion, days | 10 (6-21)            | 6 (5-12)         | 0.020    |
| ICU length of stay after the inclusion, day                  | 19 (10-41)           | 16 (10-22)       | 0.158    |
| Length of stay in hospital after the inclusion, day          | 39 (27-48)           | 27 (23-37)       | 0.006    |
| GOS at the end of follow-up                                  | 3 (2-3)              | 3 (2-3)          | 0.280    |
| All-cause mortality, <i>n</i> (%) (in-hospital mortality)    | 4 (12.9)             | 12 (17.4)        | 0.770    |

Categorical variables are shown as number (percentage); continuous variables are shown as median (interquartile range).

*APACHE* Acute Physiology and Chronic Health Evaluation, *FiO<sub>2</sub>* inspired oxygen fraction, *GCS* Glasgow Coma Scale, *GOS* Glasgow Outcome Scale, *ICU* intensive care unit, *PaO<sub>2</sub>* arterial partial pressure of oxygen, *SOFA* Sequential Organ Failure Assessment
